# Supplementary material
Source: MDPI journal article supplement (https://www.mdpi.com/2079-6412/11/9/1109)
Supplement: s1 [file s1]

# Supplementary Materials: Assessment of Stone Protective Coatings with a Novel Eco-friendly Encapsulated Biocide

Martina Zuena, Ludovica Ruggiero, Giulia Caneva, Flavia Bartoli, Giancarlo Della Ventura, Maria Antonietta Ricci and Armida Sodo \*

Dipartimento di Scienze, Università degli Studi “Roma Tre”, Via della Vasca Navale 84, 00146 Roma, Italy; martina.zuena@uniroma3.it (M.Z.); ludovica.ruggiero@uniroma3.it (L.R.); giulia.caneva@uniroma3.it (G.C.); flavia.bartoli@uniroma3.it (F.B.); giancarlo.dellaventura@uniroma3.it (G.D.V.); mariaantonia.ricci@uniroma3.it (M.A.R.)

\* Correspondence: armida.sodo@uniroma3.it (A.S.)

**Table S1.** Amount of product applied—the difference of sample weight before and right immediately after the coating application.

| Sample         | Amount of applied product (kg/m <sup>2</sup> ) |                         |                          |
|----------------|------------------------------------------------|-------------------------|--------------------------|
|                | Si_Control                                     | Si_TiO <sub>2</sub> -NC | Si_TiO <sub>2</sub> -MNP |
| Brick          | 0.62 ± 0.03                                    | 0.92 ± 0.01             | 0.79 ± 0.04              |
| Mortar         | 0.70 ± 0.12                                    | 0.74 ± 0.01             | 0.87 ± 0.06              |
| Travertine     | 0.06 ± 0.02                                    | 0.12 ± 0.01             | 0.14 ± 0.01              |
| Carrara Marble | 0.11 ± 0.03                                    | 0.17 ± 0.06             | 0.23 ± 0.01              |

**Table S2.** Amount of product retained—the difference of sample weight before and 1 week after the coating application.

| Sample         | Quantity of dry matter retained (kg/m <sup>2</sup> ) |                         |                          |
|----------------|------------------------------------------------------|-------------------------|--------------------------|
|                | Si_Control                                           | Si_TiO <sub>2</sub> -NC | Si_TiO <sub>2</sub> -MNP |
| Brick          | 0.017 ± 0.001                                        | 0.011 ± 0.002           | 0.028 ± 0.001            |
| Mortar         | 0.005 ± 0.001                                        | 0.070 ± 0.028           | 0.117 ± 0.009            |
| Travertine     | 0.003 ± 0.002                                        | 0.003 ± 0.001           | 0.003 ± 0.001            |
| Carrara Marble | 0.003 ± 0.001                                        | 0.001 ± 0.001           | 0.003 ± 0.003            |

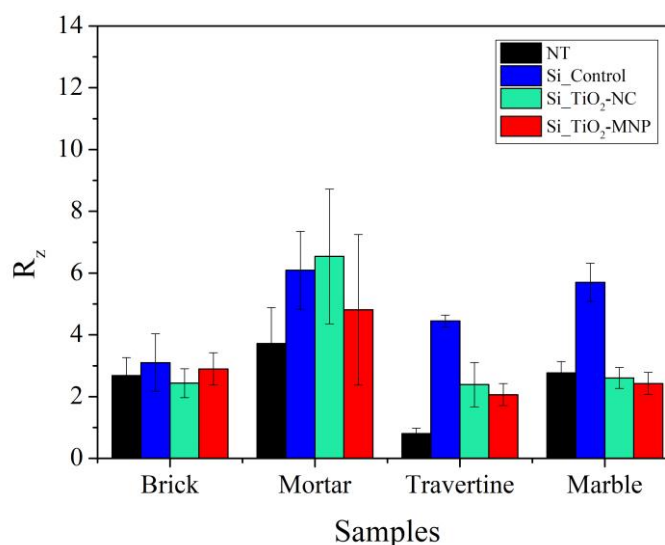

**Figure S1.** The roughness  $R_z$  estimated for both treated and untreated stones (NT).

**Table S3.** Brightness  $L^*$ , red–green chromatic component  $a^*$  and yellow–blue chromatic component  $b^*$  acquired before and after the coatings application on all stones.

| Sample | Color data | Treatment       |                 |                 |                         |                |                          |
|--------|------------|-----------------|-----------------|-----------------|-------------------------|----------------|--------------------------|
|        |            | NT              | Si_Control      | NT              | Si_TiO <sub>2</sub> -NC | NT             | Si_TiO <sub>2</sub> -MNP |
| BR     | $L^*$      | $59.8 \pm 2.1$  | $59.7 \pm 1.9$  | $60.3 \pm 0.5$  | $61.5 \pm 0.9$          | $60.8 \pm 0.9$ | $62.3 \pm 0.7$           |
|        | $a^*$      | $14.4 \pm 0.9$  | $14.3 \pm 0.5$  | $14.9 \pm 0.5$  | $14.1 \pm 0.5$          | $15.2 \pm 0.6$ | $14.2 \pm 0.4$           |
|        | $b^*$      | $25.3 \pm 0.8$  | $24.9 \pm 0.7$  | $25.5 \pm 0.7$  | $23.4 \pm 0.6$          | $25.8 \pm 0.8$ | $23.4 \pm 0.3$           |
| MO     | $L^*$      | $74.2 \pm 2.7$  | $73.3 \pm 2.6$  | $75.5 \pm 1.9$  | $75.9 \pm 2.2$          | $75.7 \pm 1.9$ | $76.7 \pm 1.8$           |
|        | $a^*$      | $-0.2 \pm 0.2$  | $-0.7 \pm 0.2$  | $0.1 \pm 0.1$   | $0.1 \pm 0.1$           | $-0.1 \pm 0.1$ | $-0.1 \pm 0.3$           |
|        | $b^*$      | $11.1 \pm 0.8$  | $11.4 \pm 0.6$  | $10.6 \pm 0.7$  | $11.1 \pm 0.7$          | $10.1 \pm 1.2$ | $10.6 \pm 1.3$           |
| TR     | $L^*$      | $85.0 \pm 2.8$  | $85.3 \pm 2.4$  | $86.5 \pm 2.7$  | $86.7 \pm 3.0$          | $85.9 \pm 2.5$ | $85.8 \pm 2.9$           |
|        | $a^*$      | $-0.9 \pm 0.2$  | $-0.8 \pm 0.18$ | $-0.46 \pm 0.2$ | $-0.5 \pm 0.2$          | $-0.3 \pm 1.2$ | $-0.4 \pm 0.2$           |
|        | $b^*$      | $2.2 \pm 0.7$   | $1.9 \pm 0.6$   | $1.9 \pm 1.0$   | $1.1 \pm 1.2$           | $1.6 \pm 0.8$  | $2.1 \pm 0.7$            |
| MA     | $L^*$      | $91.8 \pm 0.7$  | $92.3 \pm 0.8$  | $91.9 \pm 0.7$  | $92.1 \pm 0.8$          | $92.8 \pm 1.1$ | $92.9 \pm 1.3$           |
|        | $a^*$      | $-0.8 \pm 0.01$ | $-0.7 \pm 0.01$ | $-0.2 \pm 0.03$ | $-0.2 \pm 0.1$          | $-0.3 \pm 0.1$ | $0.4 \pm 0.1$            |
|        | $b^*$      | $2.4 \pm 0.4$   | $2.3 \pm 0.4$   | $1.4 \pm 0.4$   | $2.1 \pm 0.5$           | $1.0 \pm 0.5$  | $1.8 \pm 0.4$            |

BR: brick; MO: mortar; TR: travertine; MA: Carrara marble;.

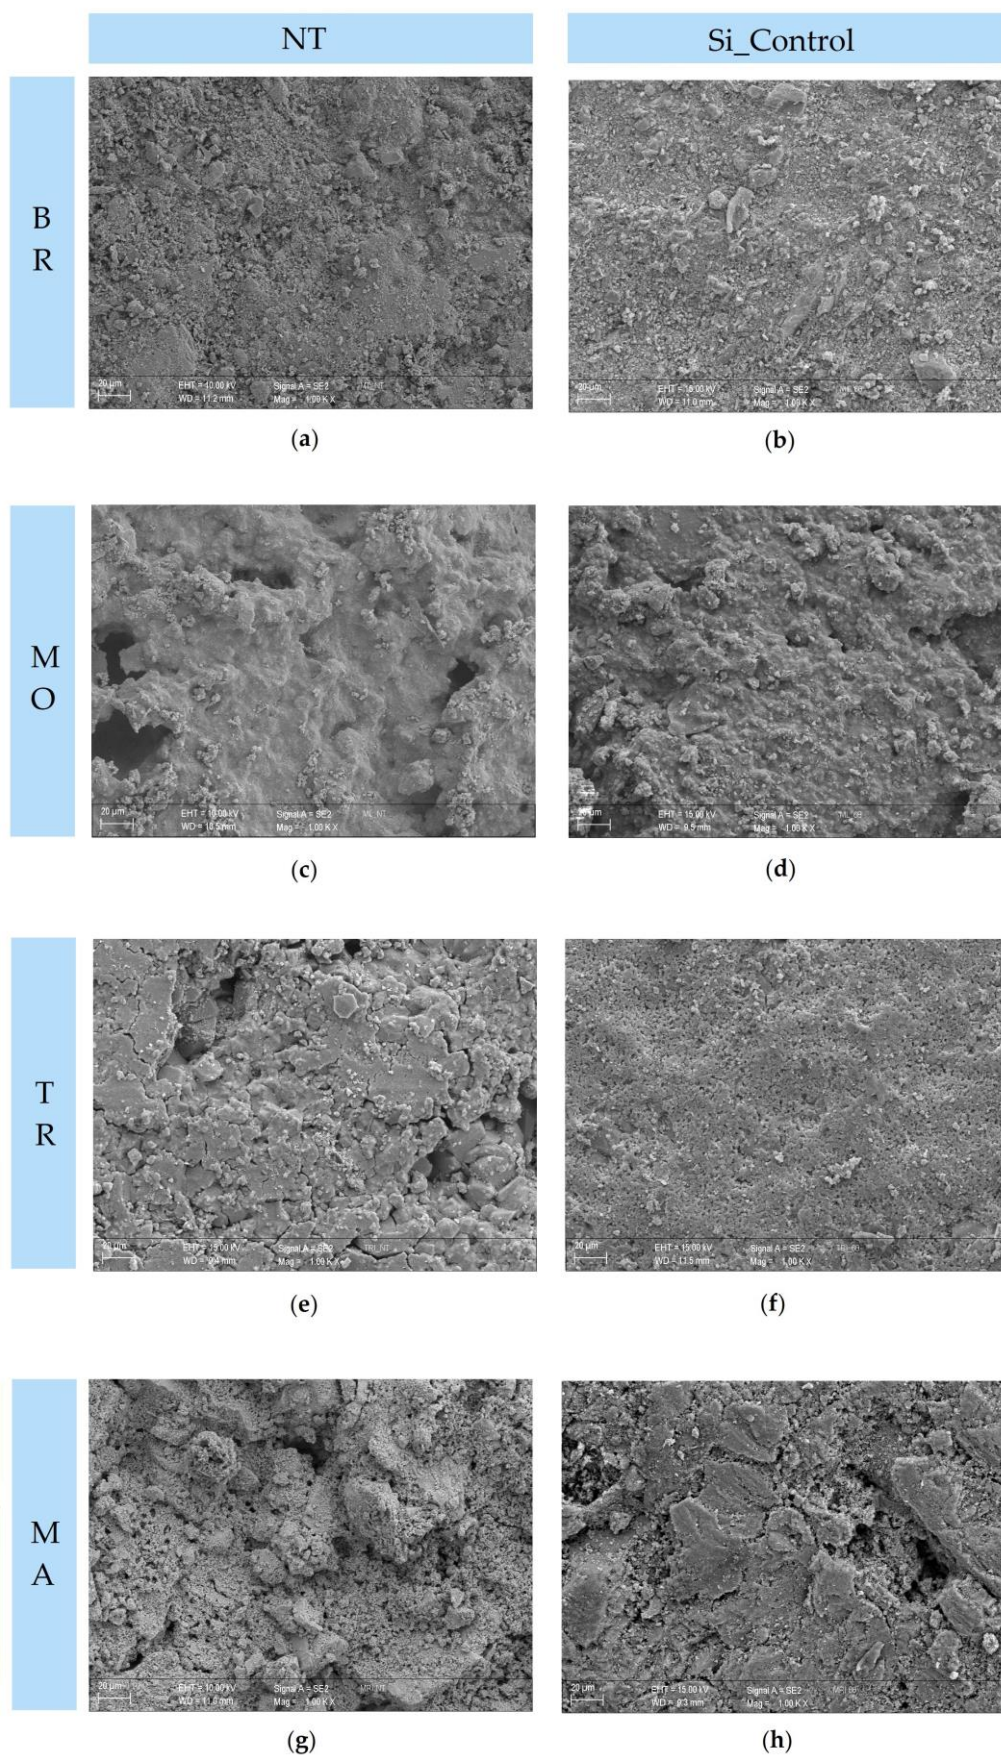

**Figure S2.** SEM images (1000×) of untreated samples and treated with empty coating: brick (BR) (a, b), mortar (MO) (c, d), travertine (TR) (e, f) and Carrara marble (MA) (g, h).

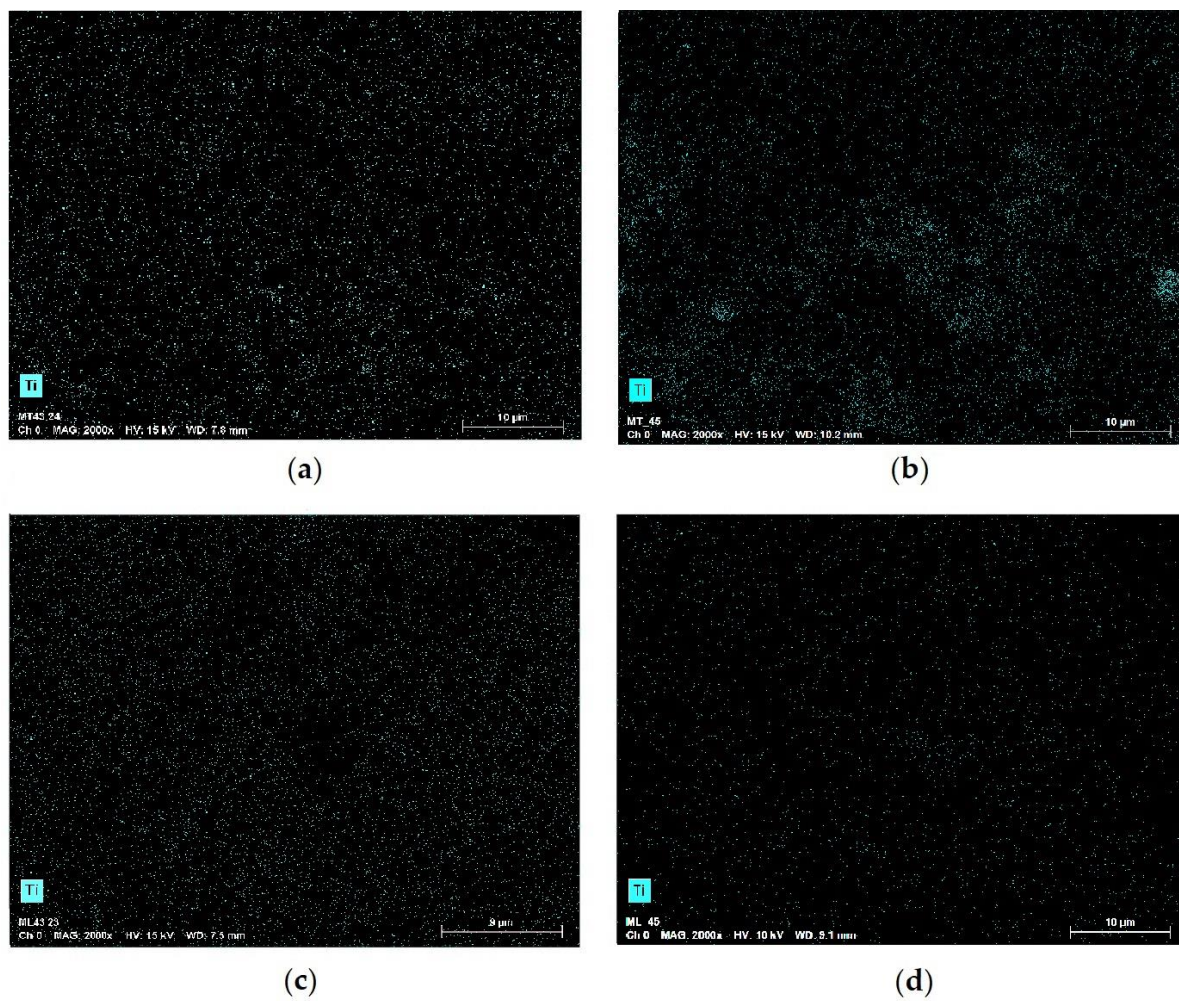

**Figure S3.** EDS-XFR Ti mapping acquired from brick and mortar: (a) brick treated with Si-TiO<sub>2</sub>-NC, (b) brick treated with Si-TiO<sub>2</sub>-MNP, (c) mortar treated with Si-TiO<sub>2</sub>-NC and (d) mortar treated with Si-TiO<sub>2</sub>-MNP.



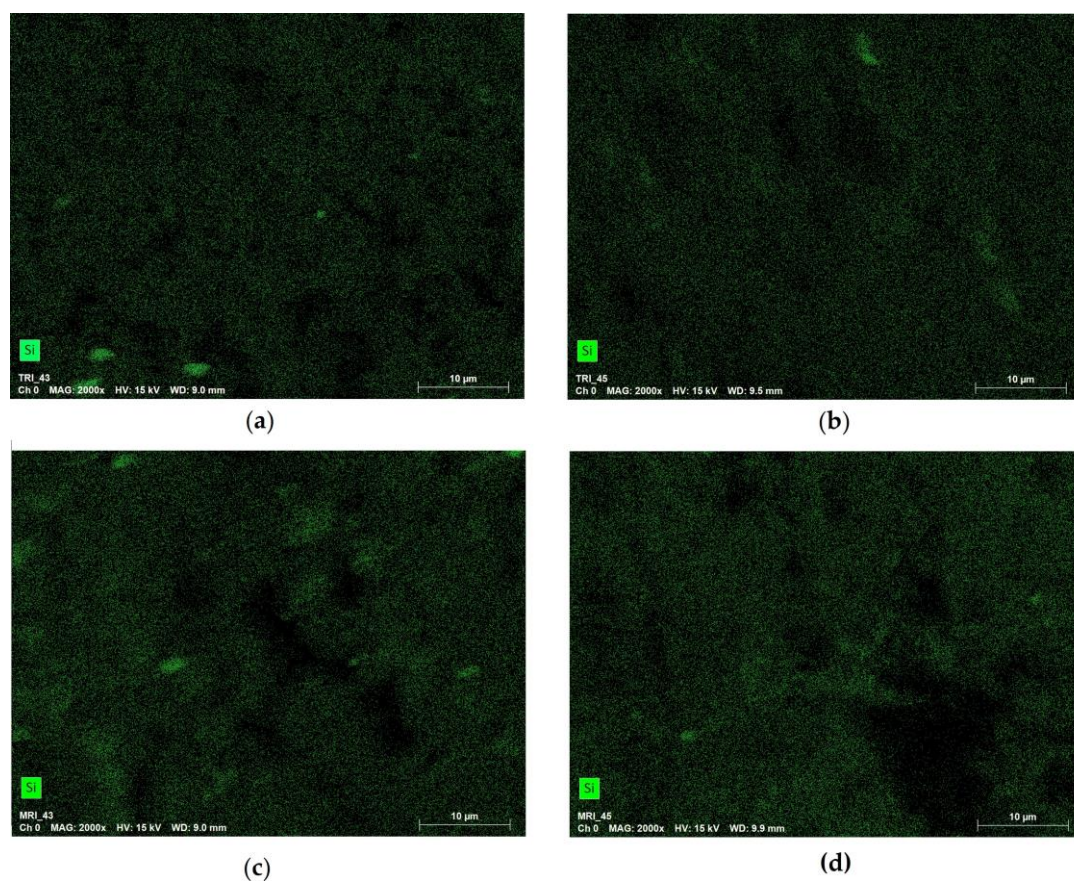

**Figure S4.** EDS-XFR Si mapping acquired from travertine and Carrara marble: (a) travertine treated with Si-TiO<sub>2</sub>-NC, (b) travertine treated with Si-TiO<sub>2</sub>-MNP, (c) Carrara Marble treated with Si-TiO<sub>2</sub>-NC and (d) Carrara marble treated with Si-TiO<sub>2</sub>-MNP.
